# Supplementary material for: Transcriptional bursting in Drosophila development: Stochastic dynamics of eve stripe 2 expression
Source: PubMed Central journal article supplement (PMC5402966; doi:10.1371/journal.pone.0176228), 2017-04-24

nascent *eve* RNA

**Figure S5A**

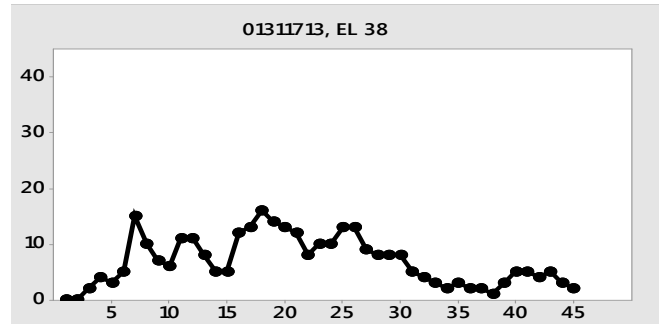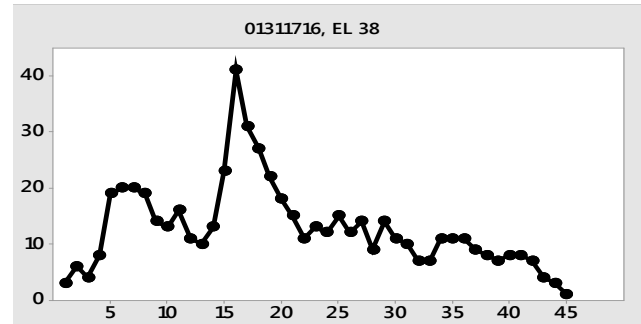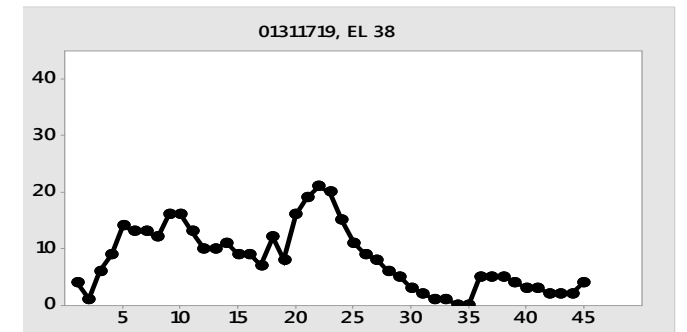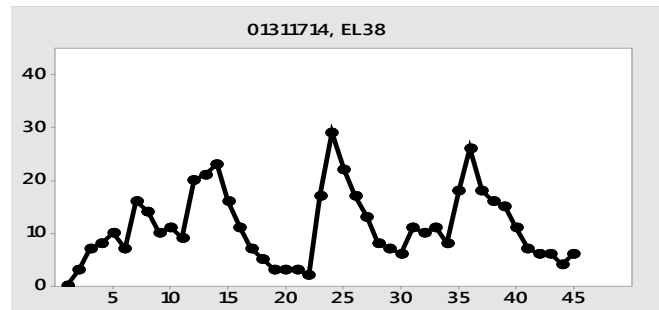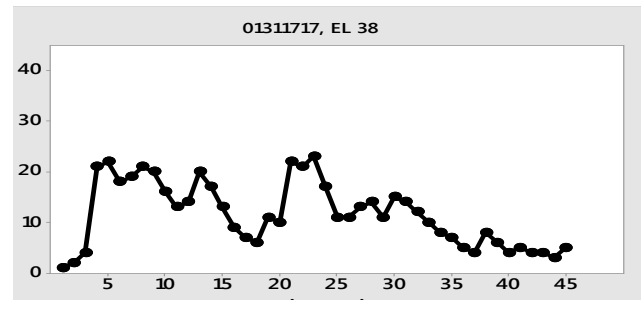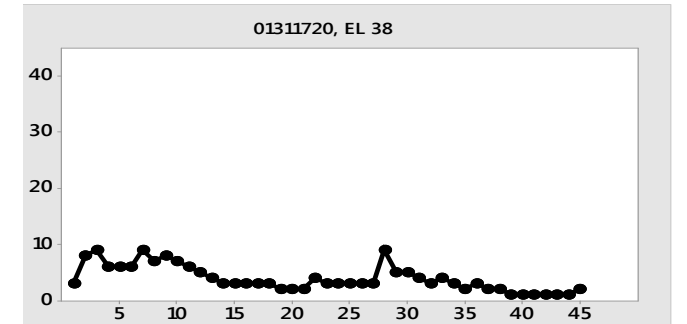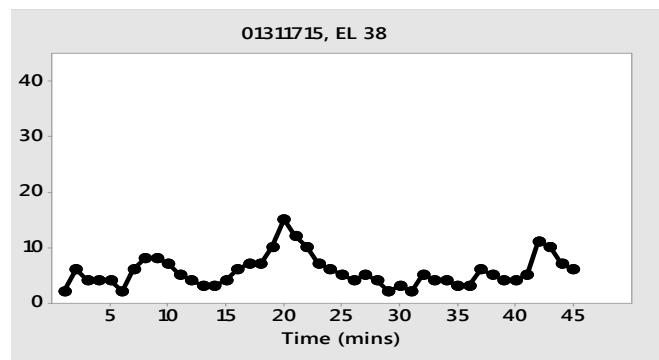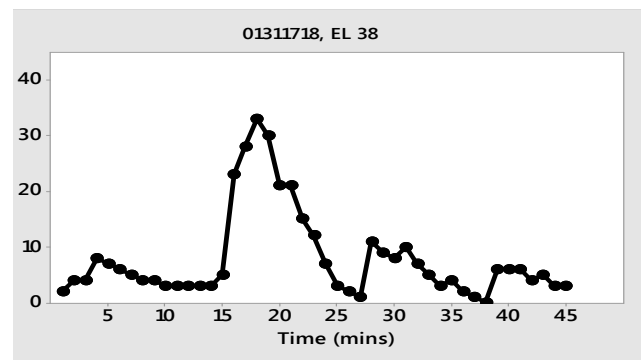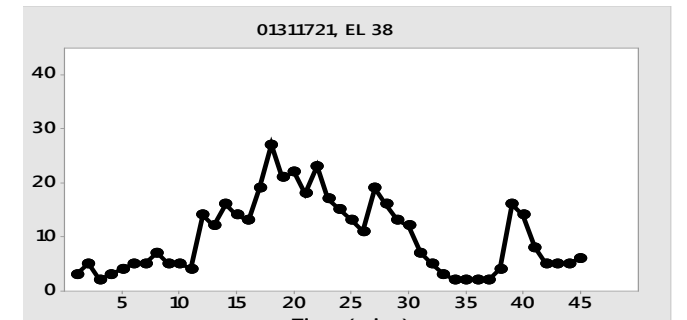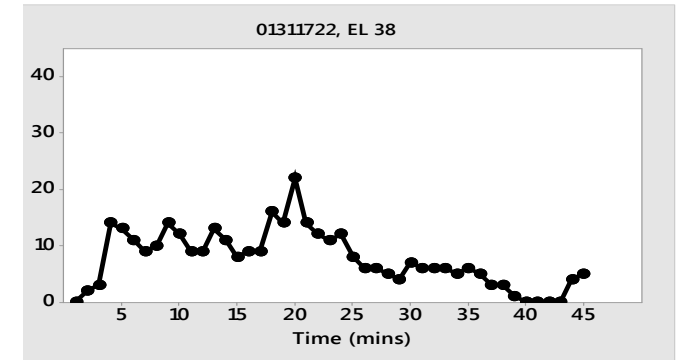

**Figure S5B**

change per minute

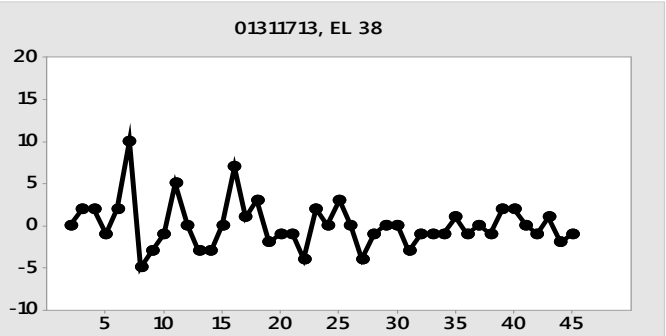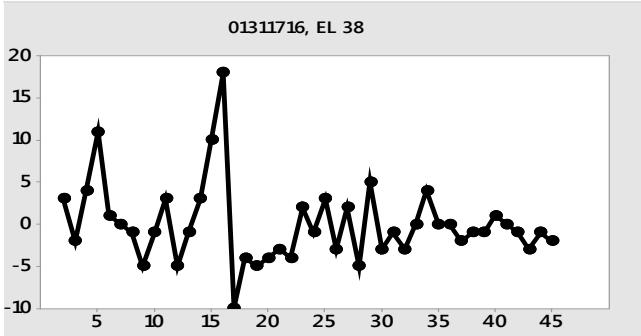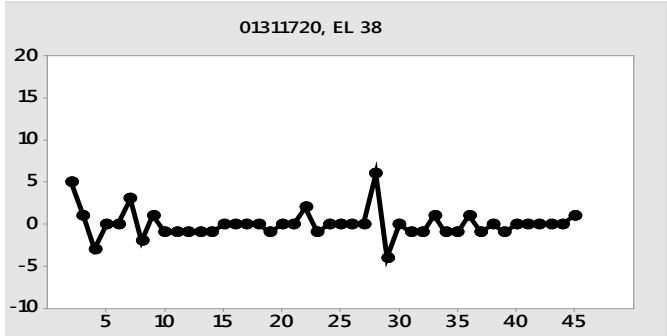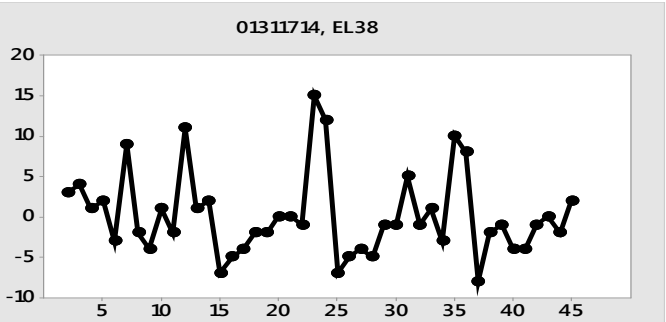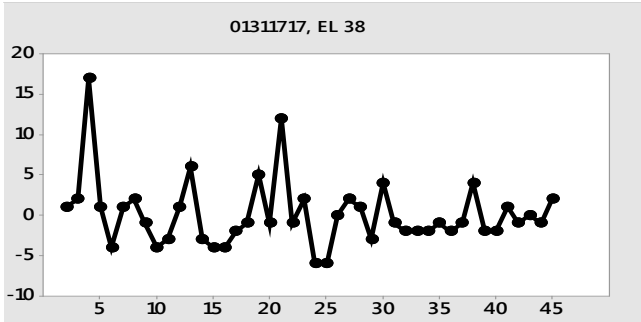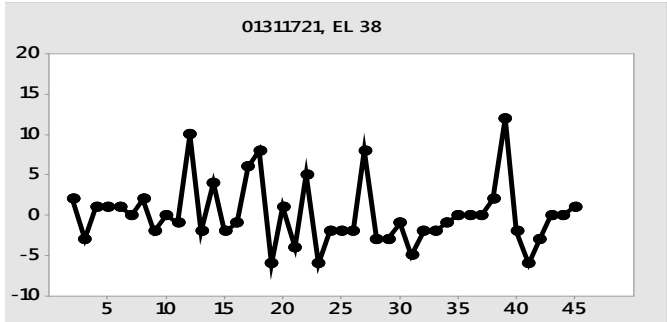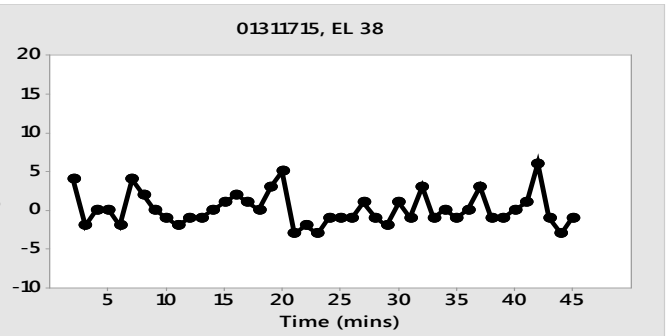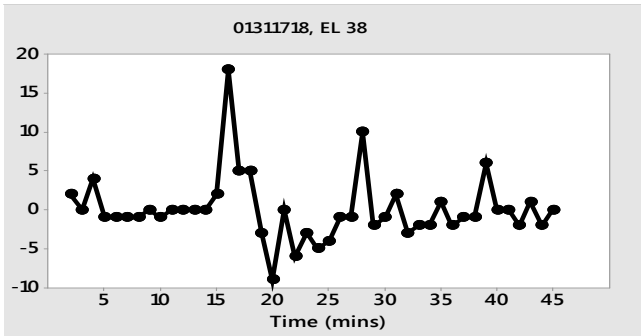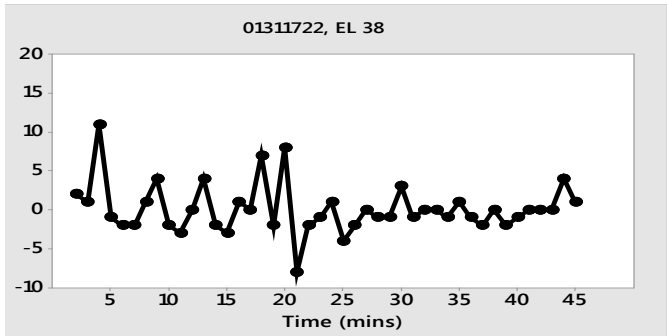

**Figure S5C**

change per minute

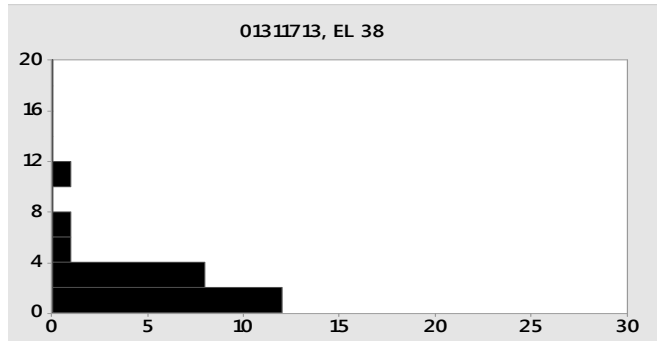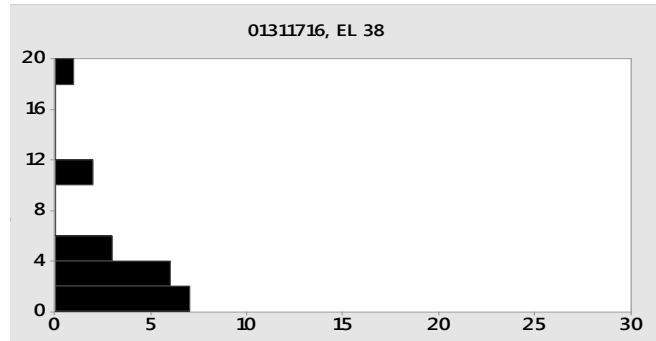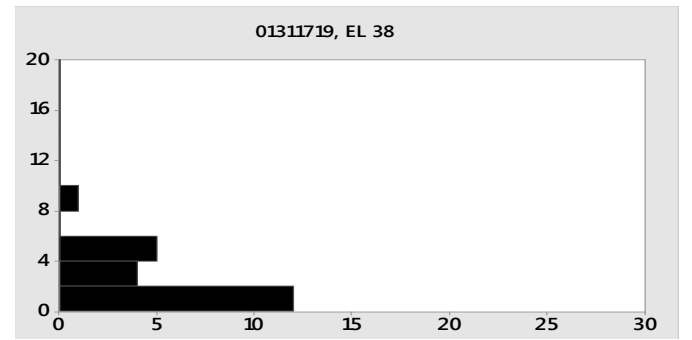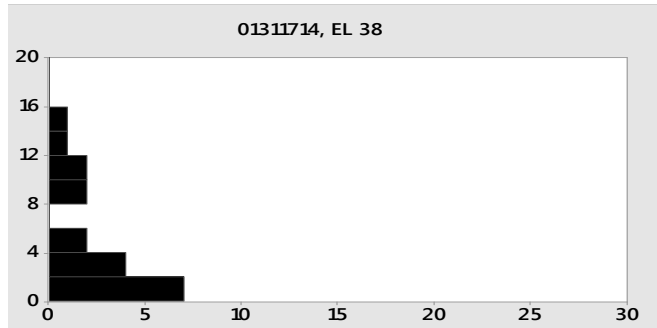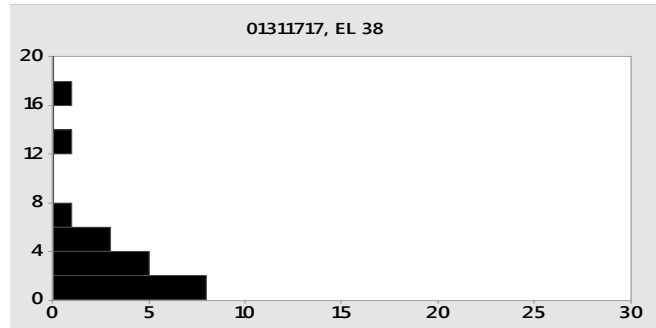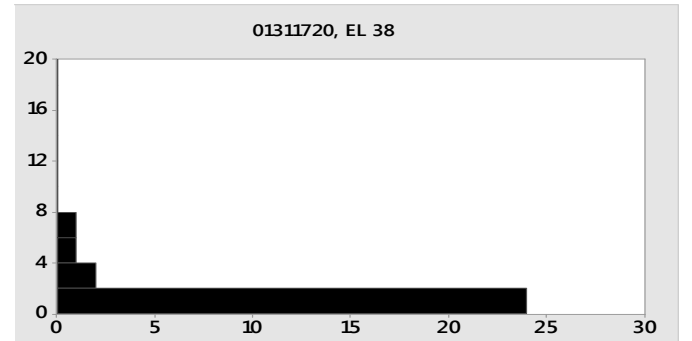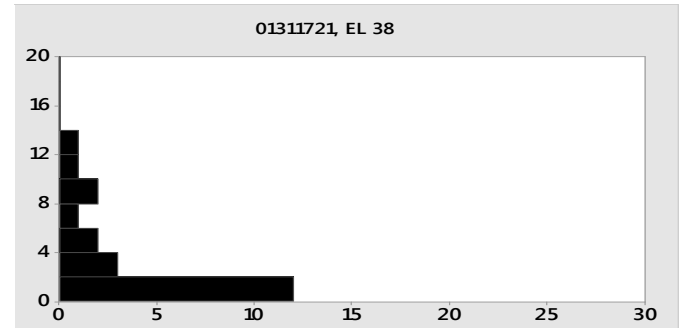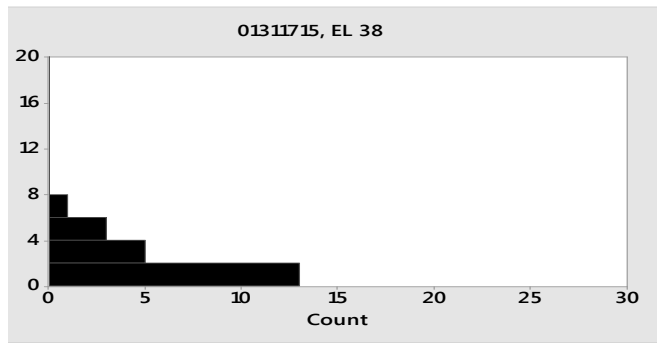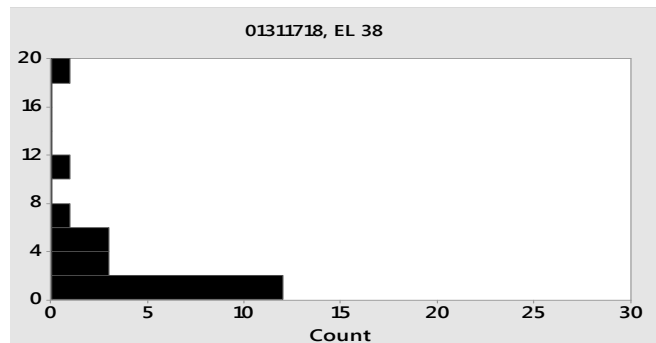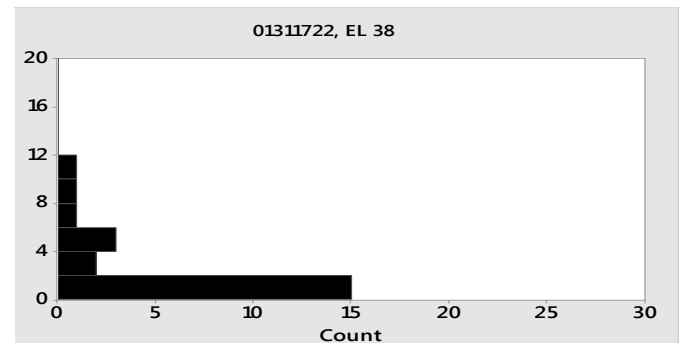

nascent *eve* RNA

**Figure S5D**

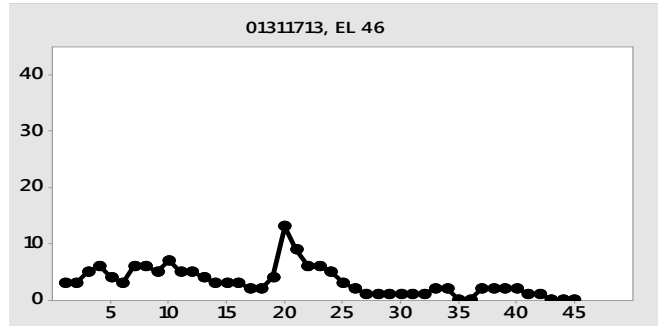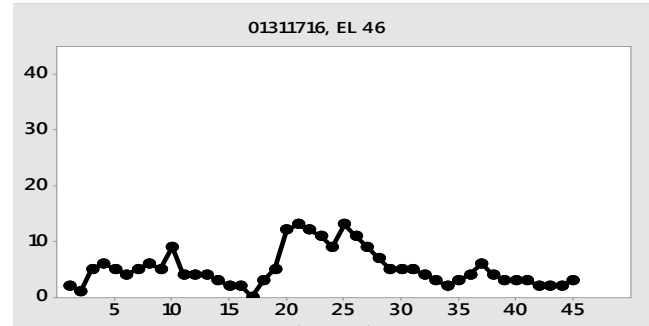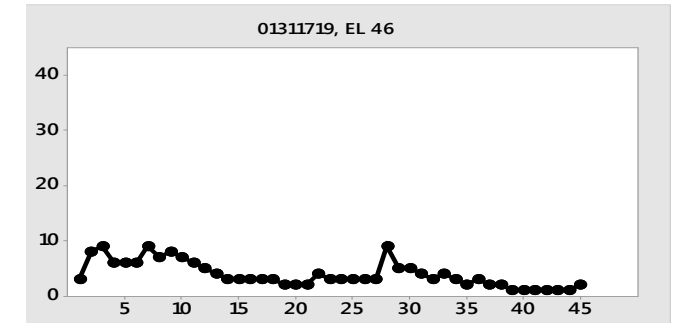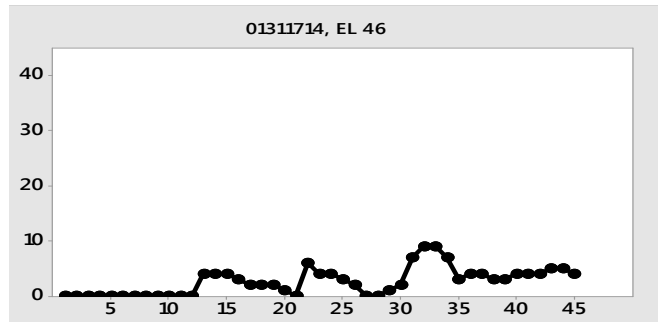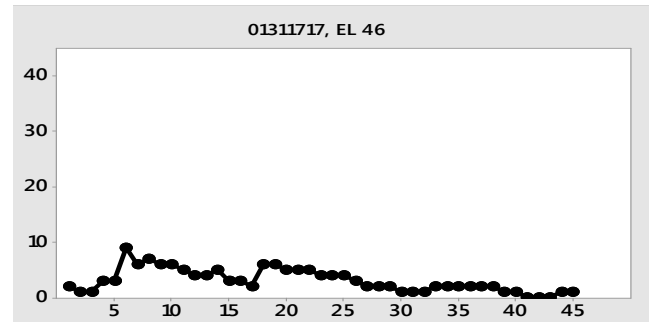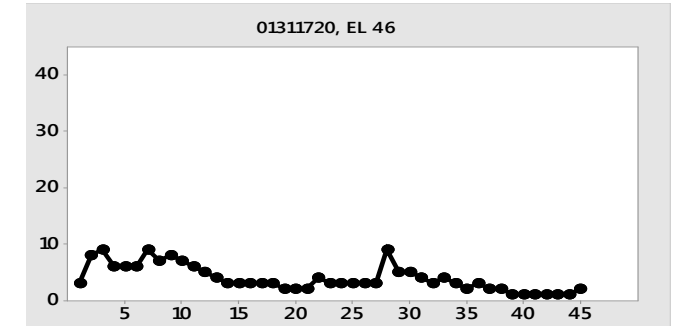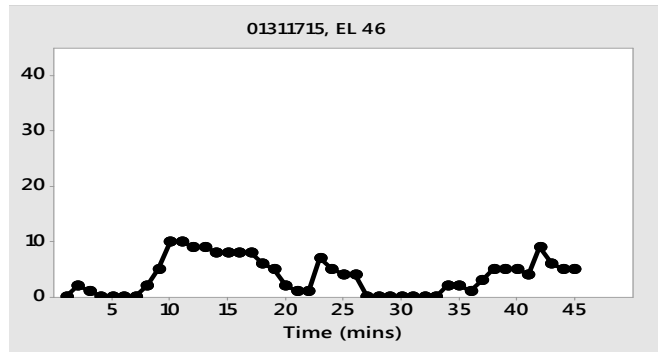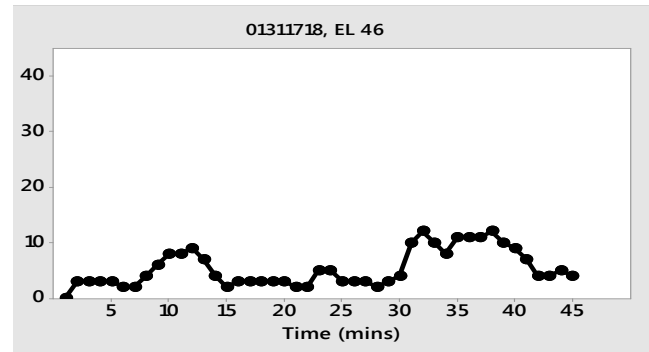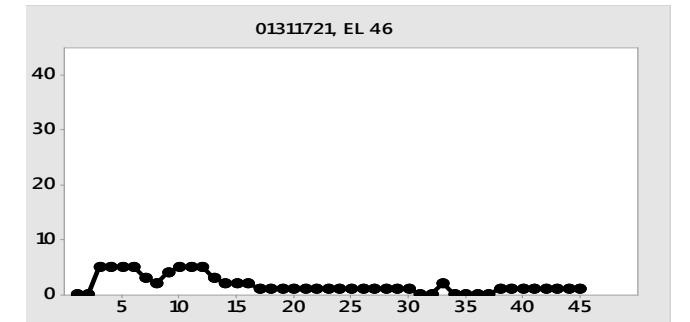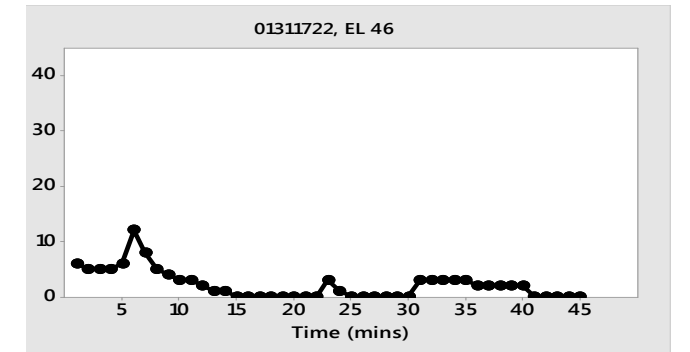

change per minute

Figure S5E

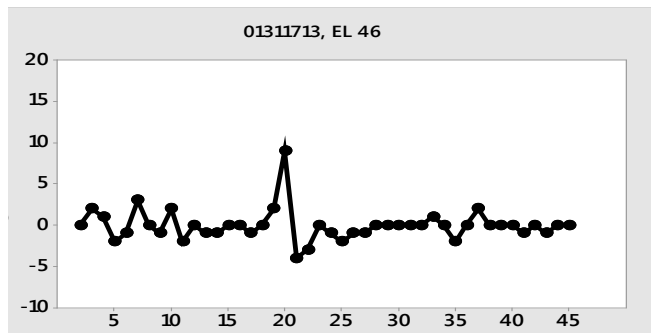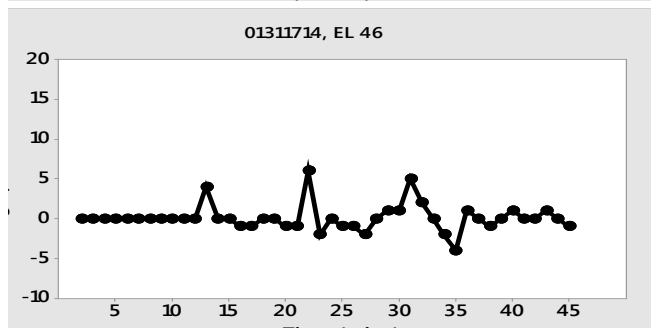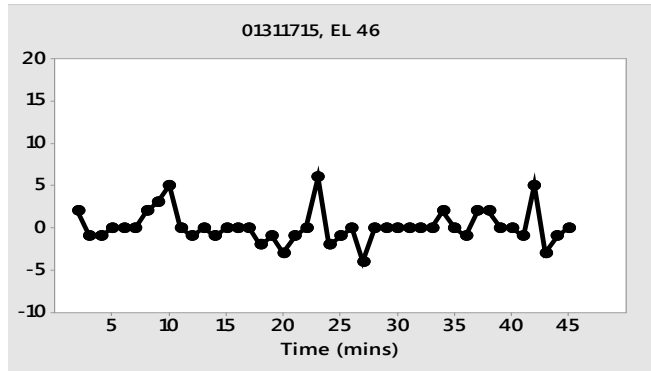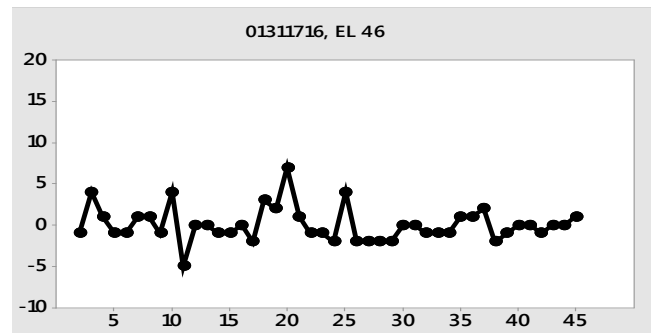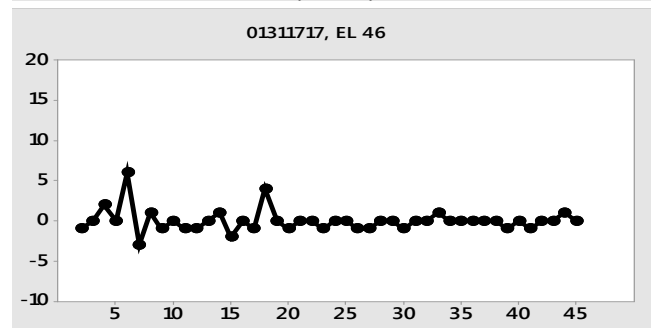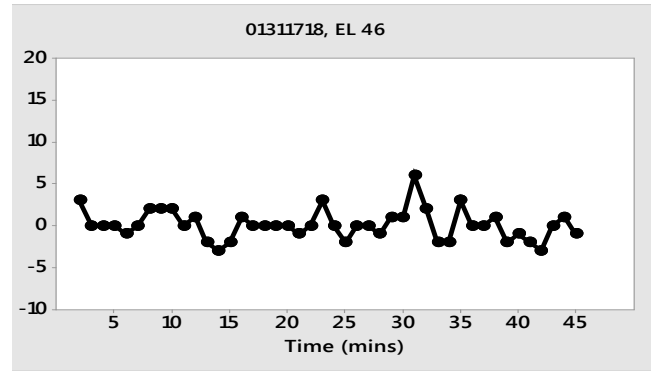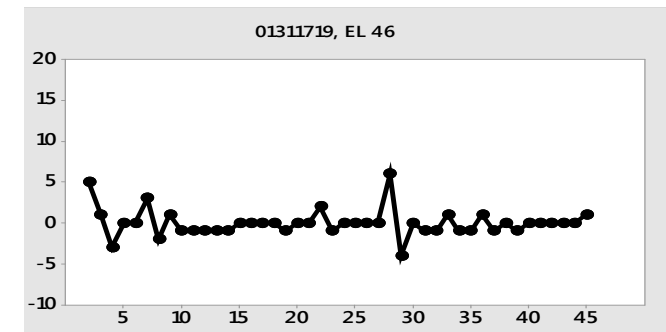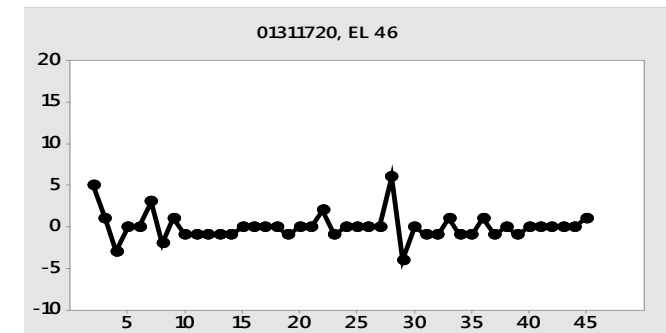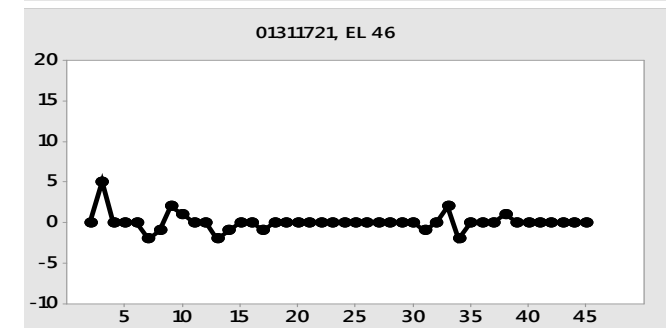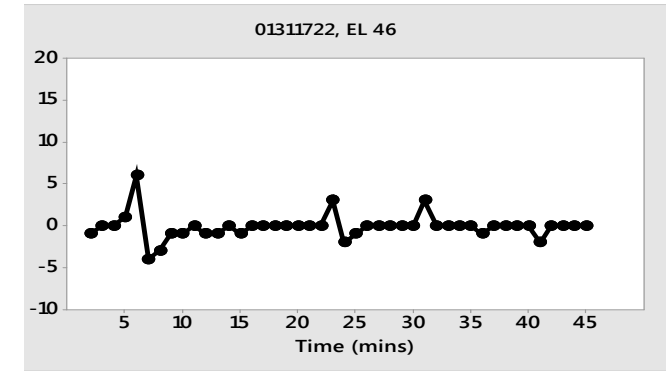

**Figure S5F**

change per minute

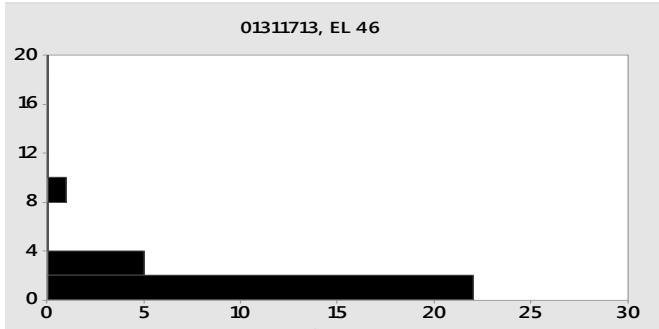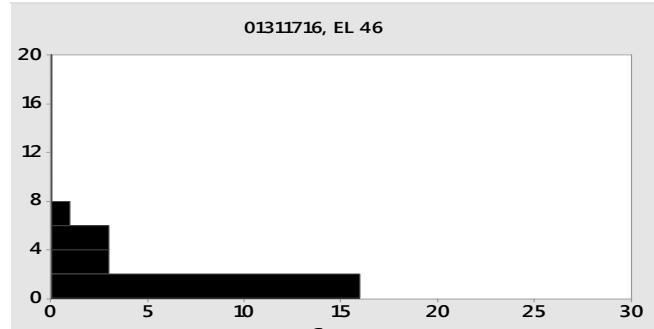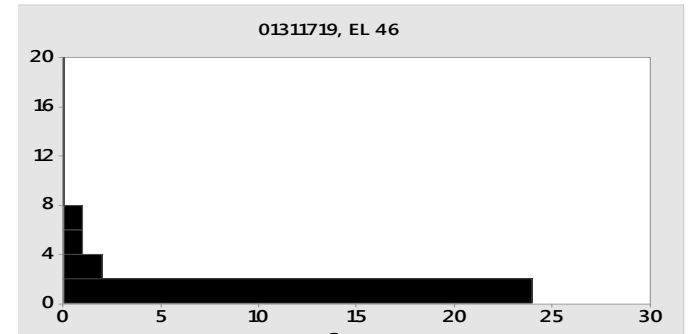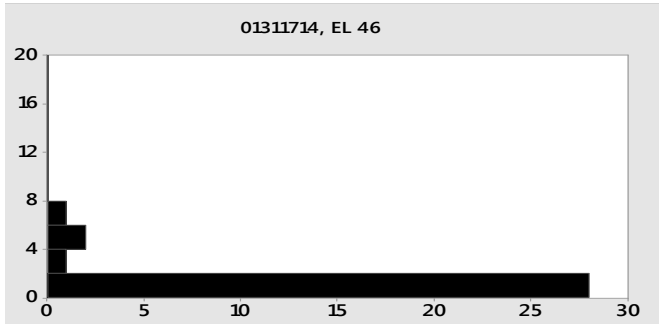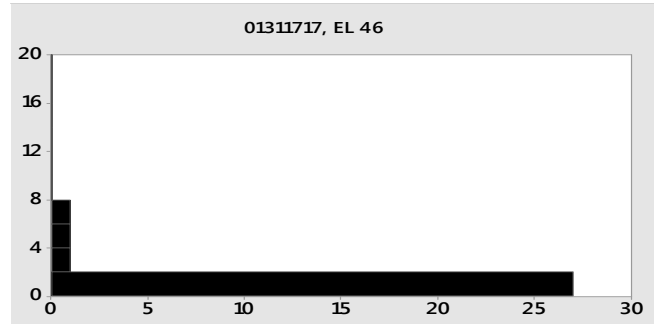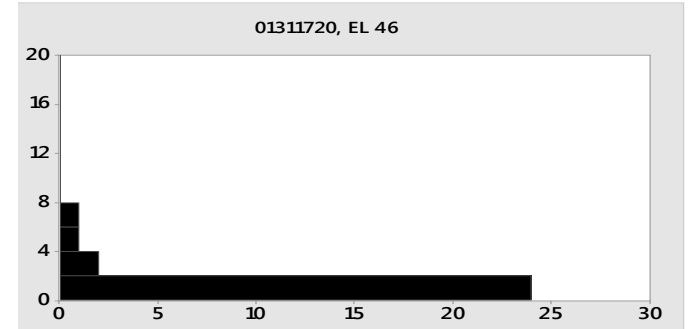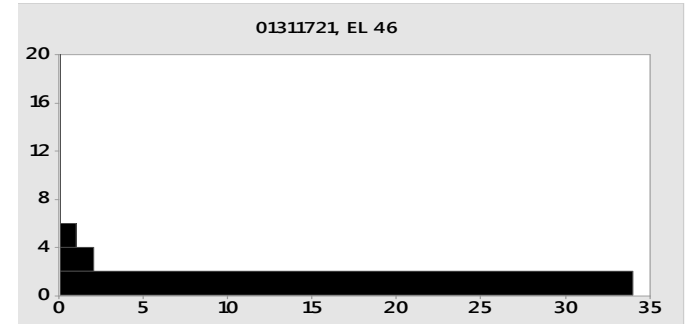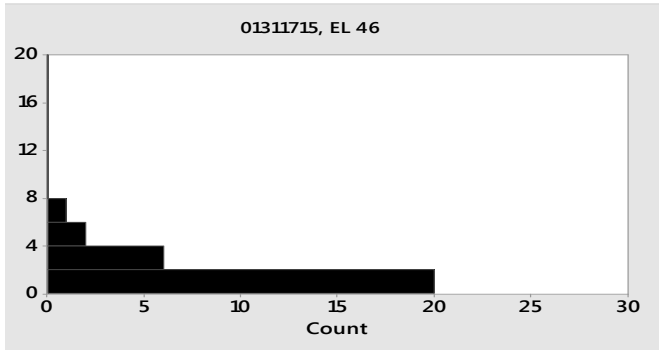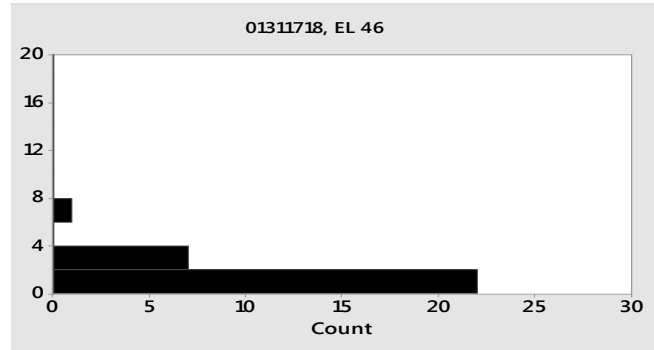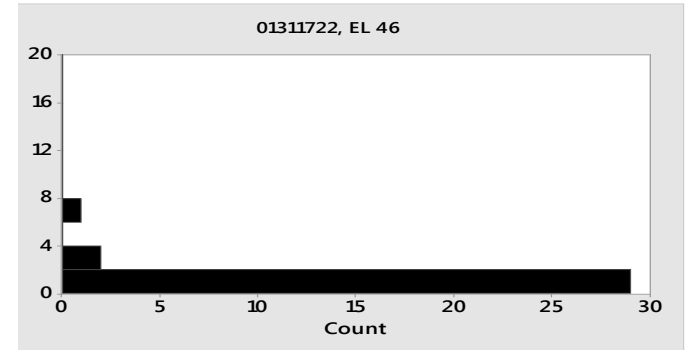

Supplement: pone.0176228.s005.pdf [file pone.0176228.s005.pdf]
