# Supplementary material for: Transcriptional bursting in Drosophila development: Stochastic dynamics of eve stripe 2 expression
Source: PubMed Central journal article supplement (PMC5402966; doi:10.1371/journal.pone.0176228), 2017-04-24
Supplement: pone.0176228.s002.pdf [file pone.0176228.s002.pdf]

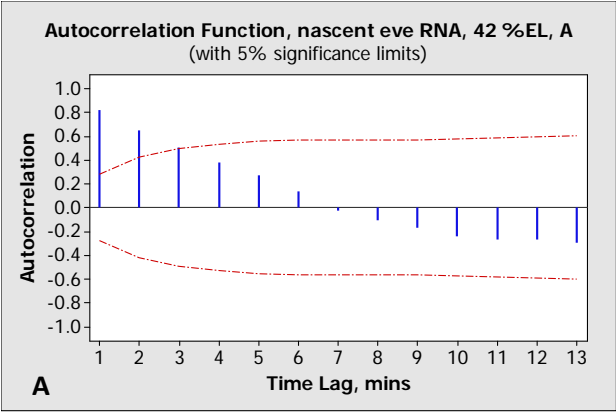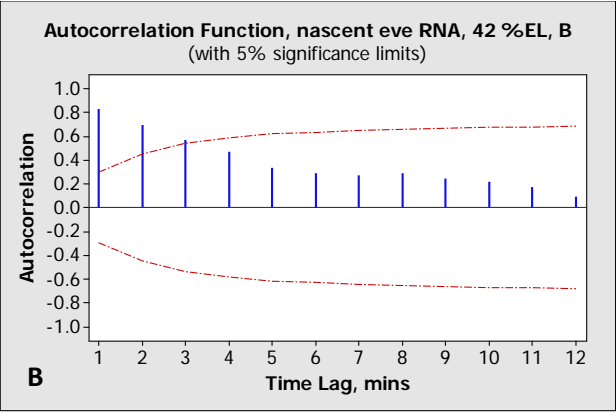

Figure S2
