# Supplementary material for: Transcriptional bursting in Drosophila development: Stochastic dynamics of eve stripe 2 expression
Source: PubMed Central journal article supplement (PMC5402966; doi:10.1371/journal.pone.0176228), 2017-04-24
Supplement: pone.0176228.s006.pdf [file pone.0176228.s006.pdf]

**Figure S6A**

**Number of RNA produced**

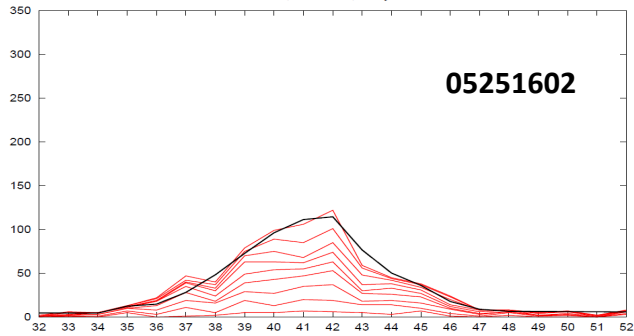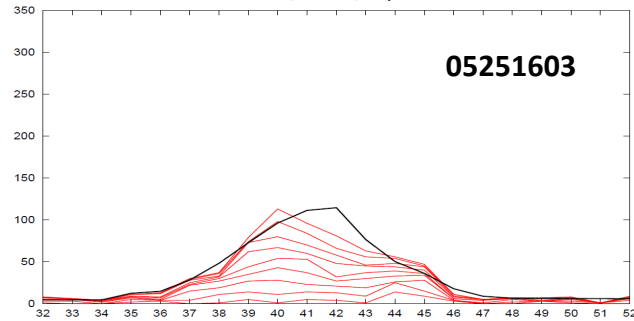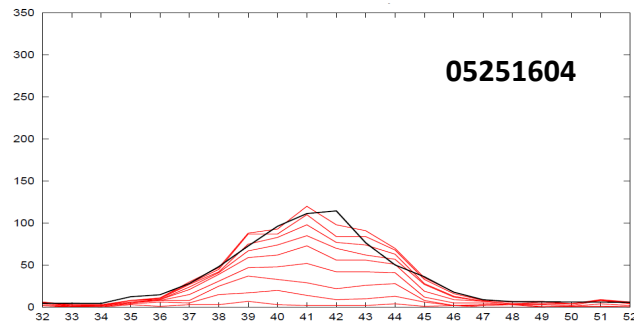

**AP position, %EL**

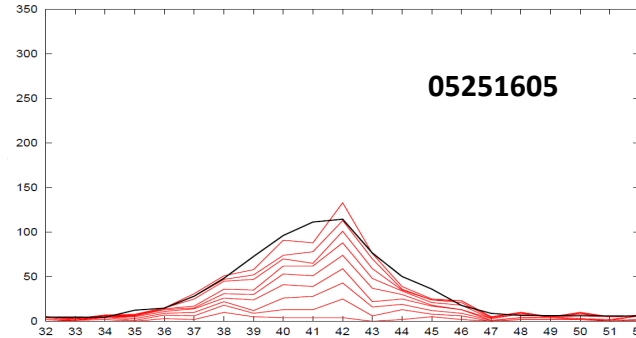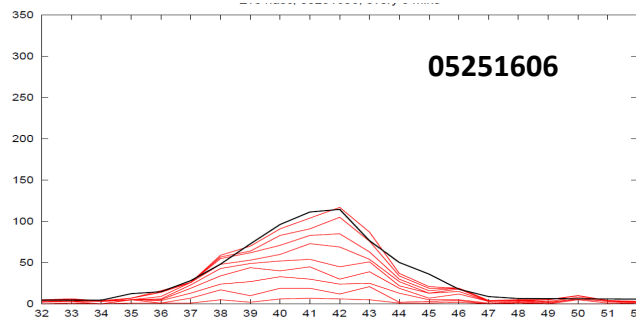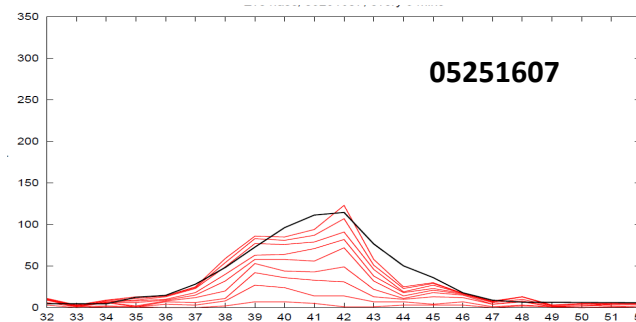

**AP position, %EL**

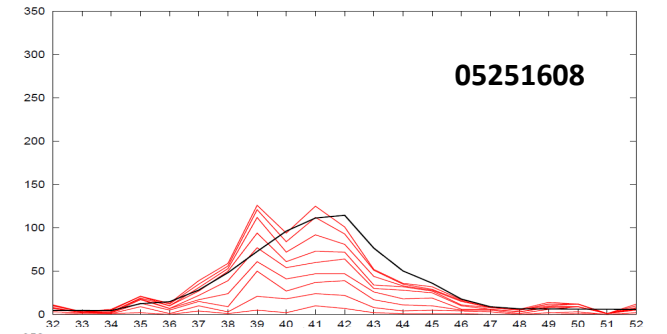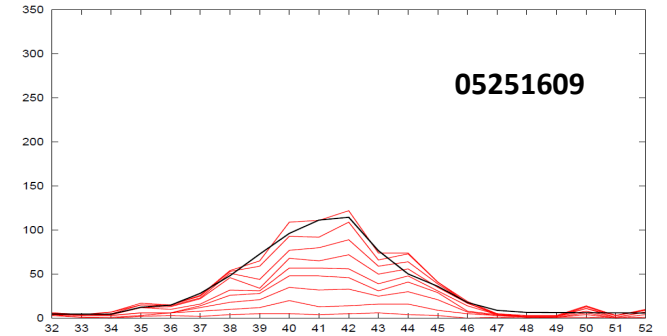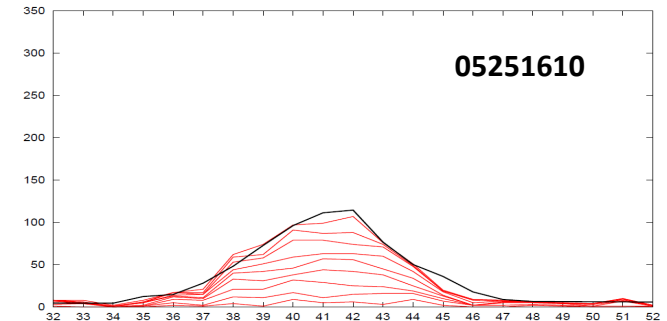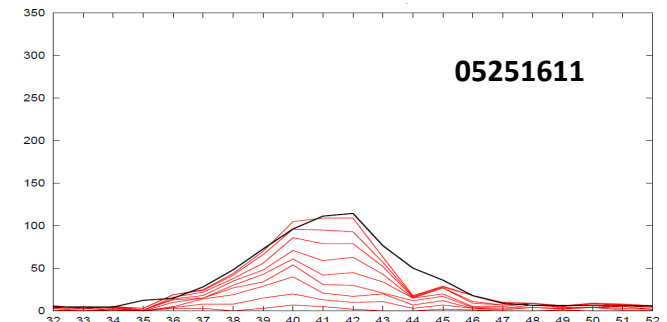

**AP position, %EL**

**Figure S6B**

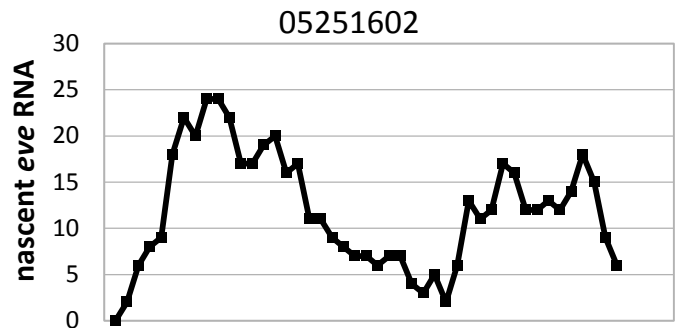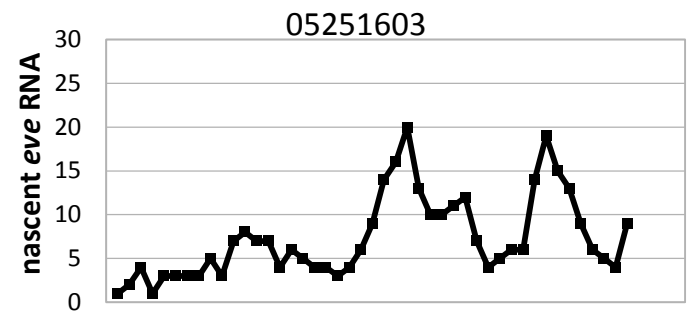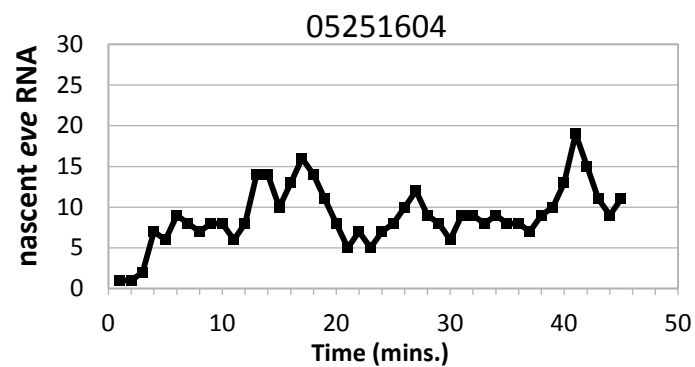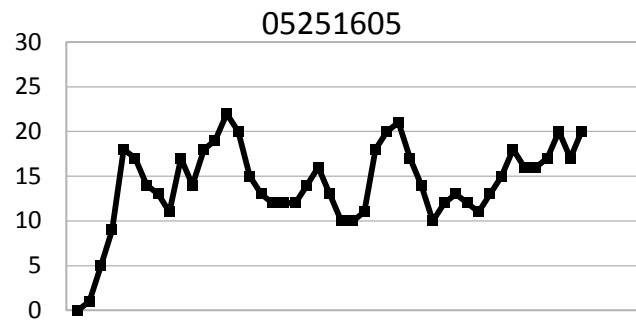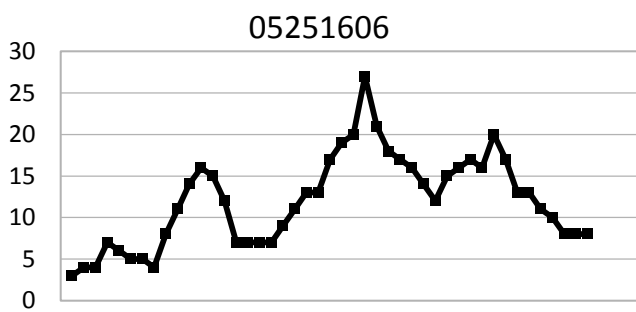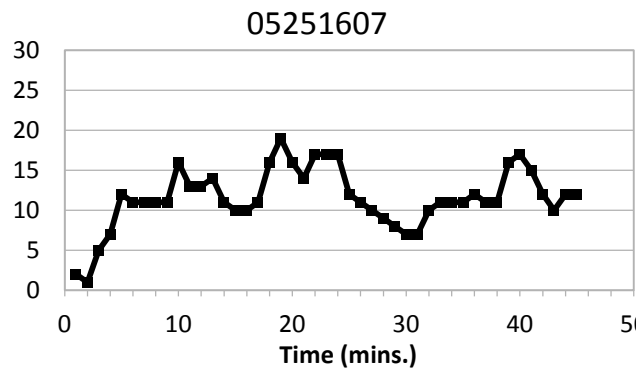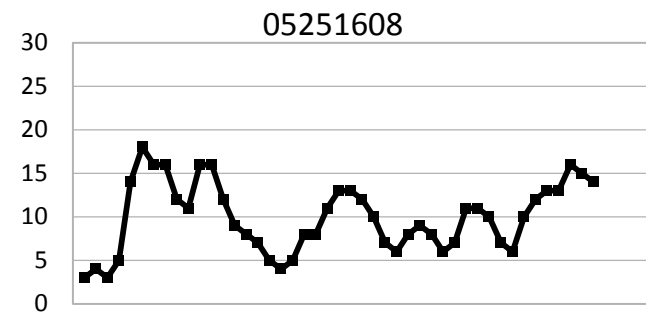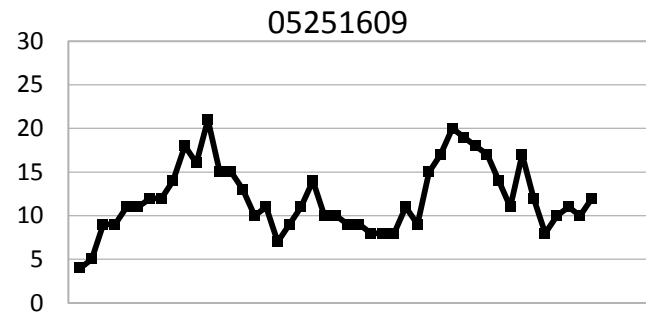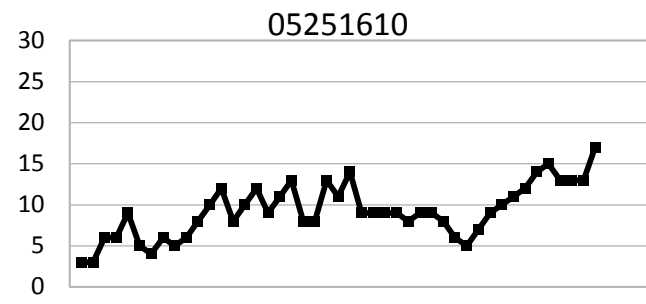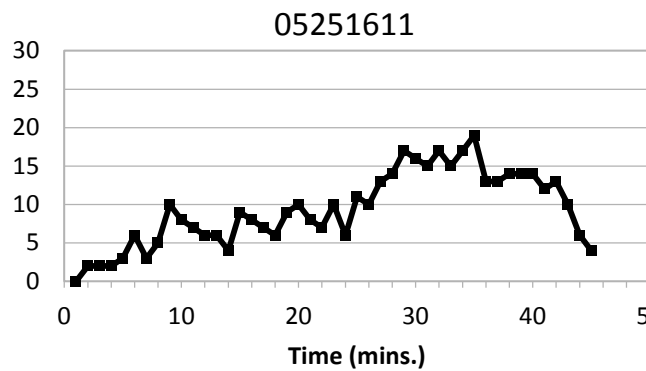

**Figure S6C**

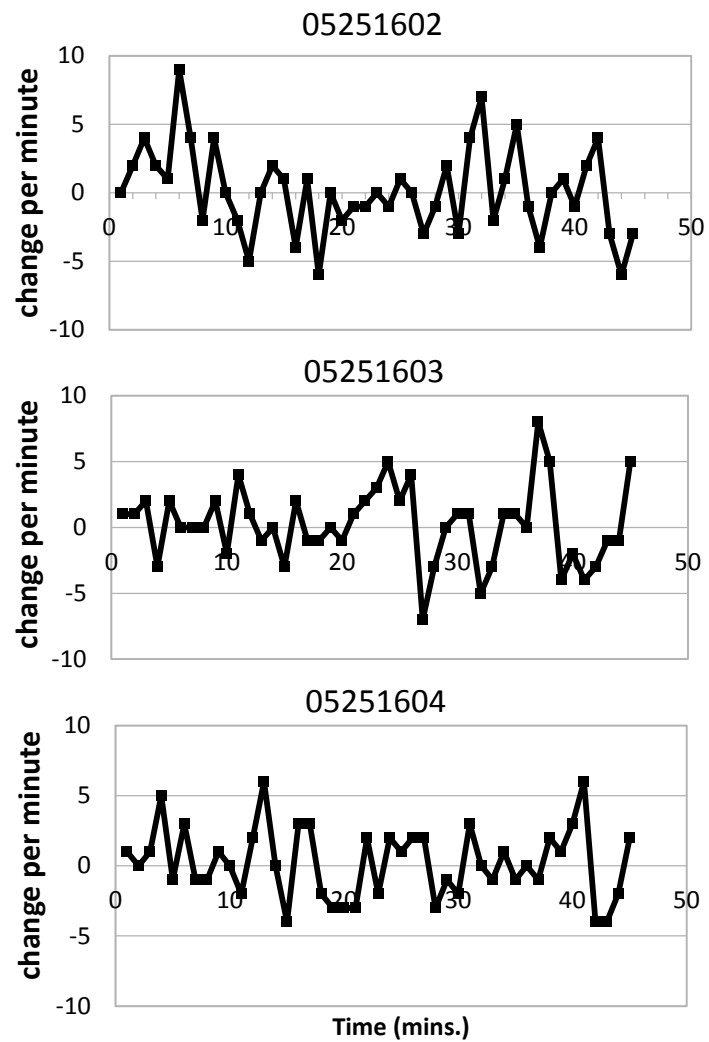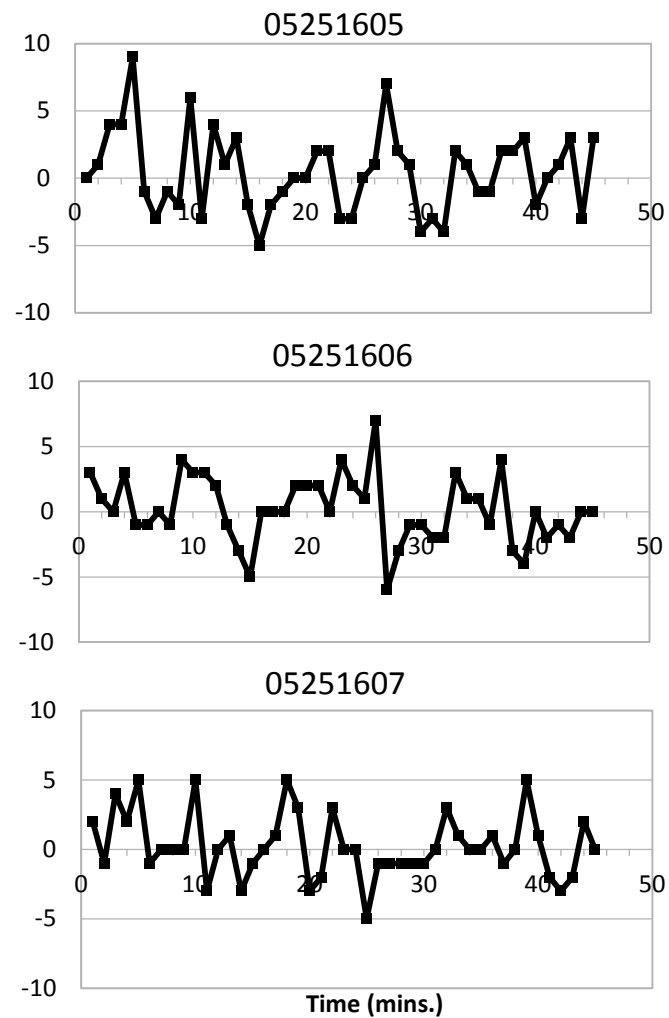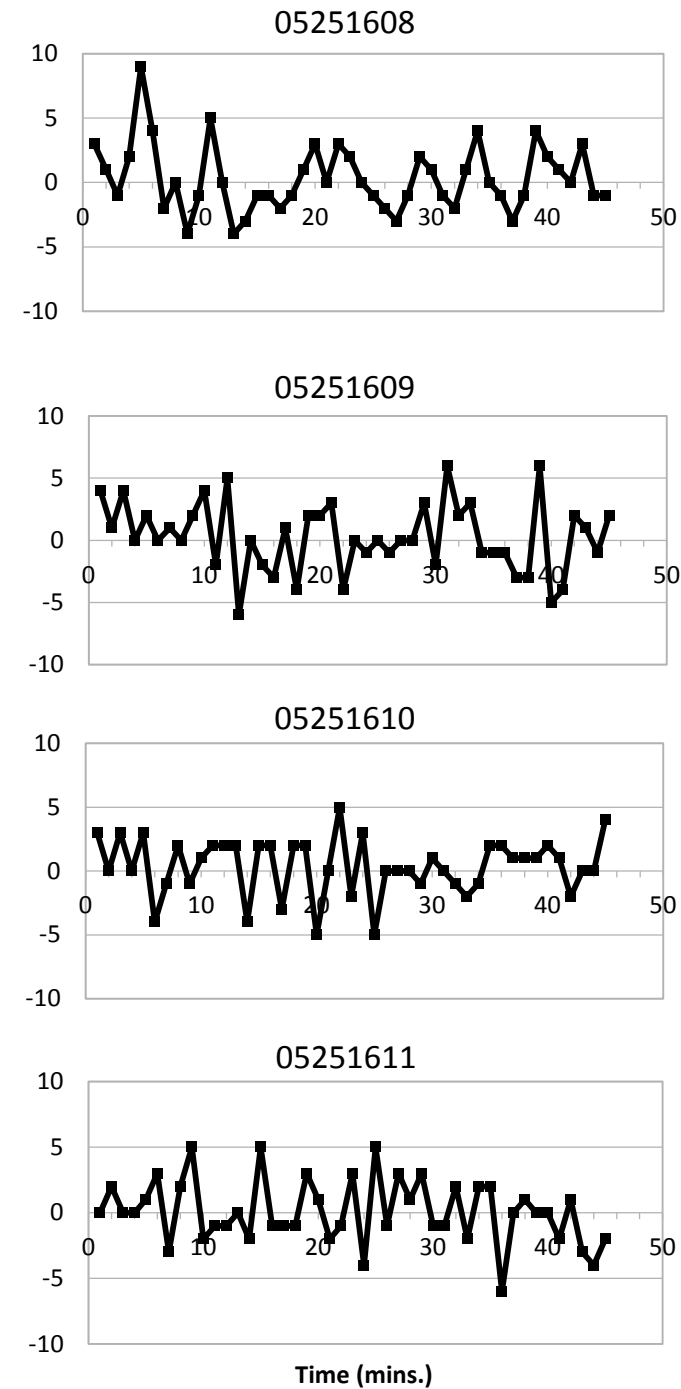

Figure S6D

change per minute

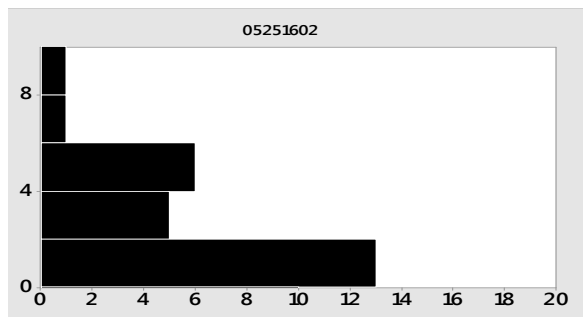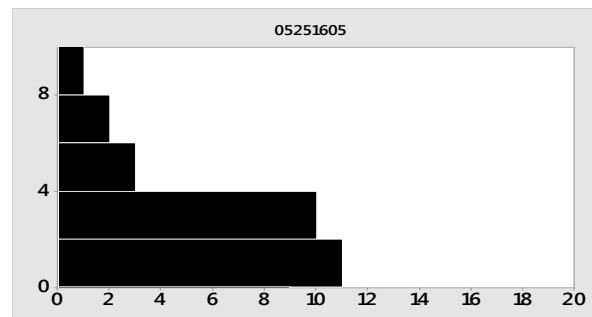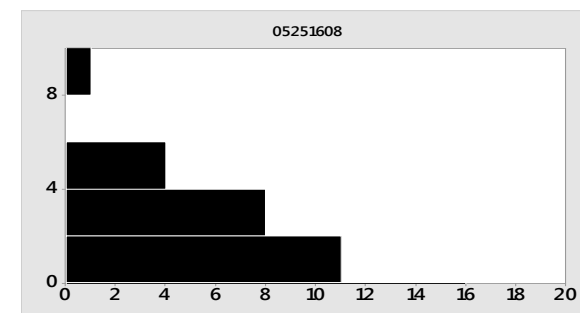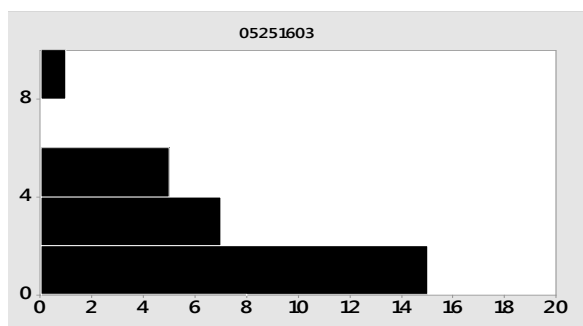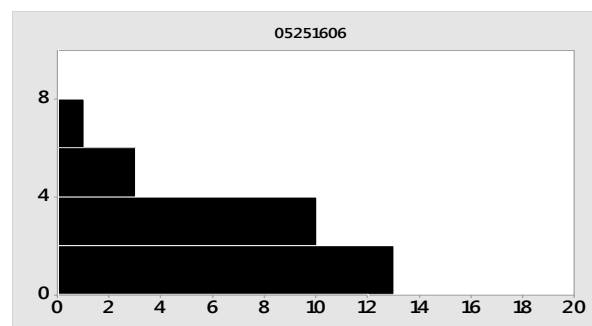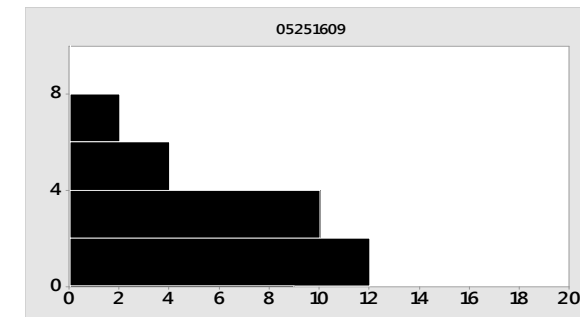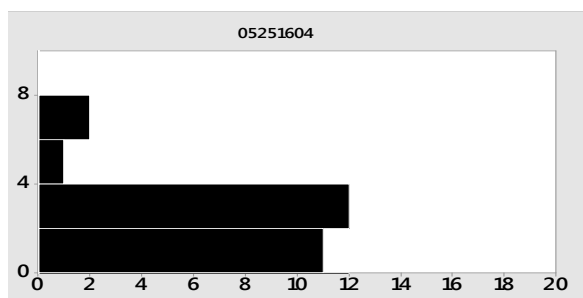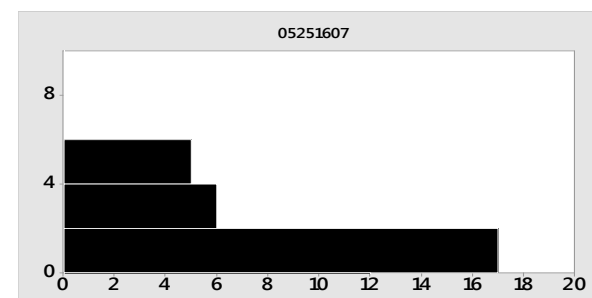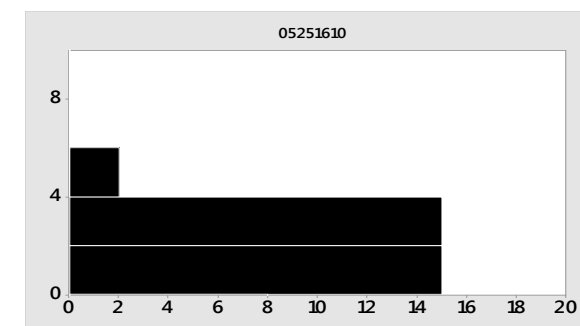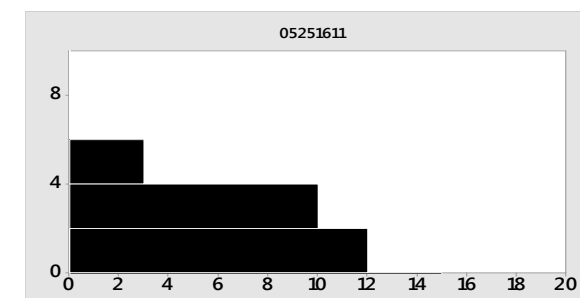

Count

Count

Count
